# Supplementary material
Source: PubMed Central journal article supplement (PMC5783668)
Supplement: EHP1374.s001.acco.pdf [file EHP1374.s001.acco.pdf]

**Note to readers with disabilities:** *EHP* strives to ensure that all journal content is accessible to all readers. However, some figures and Supplemental Material published in *EHP* articles may not conform to [508 standards](#) due to the complexity of the information being presented. If you need assistance accessing journal content, please contact [ehp508@niehs.nih.gov](mailto:ehp508@niehs.nih.gov). Our staff will work with you to assess and meet your accessibility needs within 3 working days.

### **Supplemental Material**

#### **Personal care product use in men and urinary concentrations of select phthalate metabolites and parabens: results from the Environment And Reproductive Health (EARTH) Study**

Feiby L. Nassan, Brent A. Coull, Audrey J. Gaskins, Michelle A. Williams, Niels E. Skakkebaek, Jennifer B. Ford, Xiaoyun Ye, Antonia M. Calafat, Joseph M. Braun, Russ Hauser

#### **Table of Contents**

##### **Product Use Questionnaire in the Environment And Reproductive Health (EARTH) Study.**

**Figure S1.** Spearman correlation between urinary concentrations of phthalate metabolites and parabens among 965 samples provided by men in the Environment And Reproductive Health (EARTH) Study.

**Table S1.** Adjusted <sup>a</sup> percent change associated with the weighted score: (based on binary use up to 24 hours use and 6 hours) using the weighted binary score (WBS) in the 10 imputed data.

**Table S2.** Adjusted <sup>a</sup> odds ratio for detected versus undetected urinary butylparaben associated with last 24 hours personal care product use in the 10 imputed data.

**Figure S2.** Heatmap for adjusted % change in urinary concentrations of phthalate metabolites and parabens associated with self-report use of personal care products (PCPs) within 24 hours of urine sample collection among 400 men who contributed 1037 urine samples in the Environment And Reproductive Health (EARTH) Study in the complete case data.

**Table S3.** Adjusted <sup>a</sup> odds ratio for detected versus undetected urinary butylparaben associated with last 24 hours personal care product use in the complete case data.

**Figure S3.** (Panels A to E): Adjusted % change in urinary concentrations of parabens and phthalate metabolites associated with use of 14 personal care products (PCPs) within 24 and 6 hours of urine collection in the complete case analysis.

**Table S4.** Adjusted <sup>a</sup> percent change associated with the weighted score: (based on binary use up-to 24 hours use and 6 hours) using the weighted binary score (WBS) in the complete case data.

**Figure S4.** Heatmap for adjusted % change in urinary concentrations of phthalate metabolites and parabens associated with self-report use of personal care products (PCPs) within 24 hours of urine sample collection among 400 men who contributed 1037 urine samples in the Environment And Reproductive Health (EARTH) Study in the imputed missing as zero.

**Table S5.** Adjusted <sup>a</sup> odds ratio for detected versus undetected urinary butylparaben associated with last 24 hours personal care product use in the imputed missing as zero.

**Figure S5.** (Panels A to E): Adjusted % change in urinary concentrations of parabens and phthalate metabolites associated with use of 14 personal care products (PCPs) within 24 and 6 hours of urine collection in the imputed missing as zero.

**Table S6.** Adjusted <sup>a</sup> percent change associated with the weighted score: (based on binary use up-to 24 hours use and 6 hours) using the weighted binary score (WBS) in the imputed missing as zero.

**Product Use Questionnaire in the Environment And Reproductive Health (EARTH) Study.**

| DATE: ___/___/___ TIME: ___:___ AM / PM                                              |                        | <b>PRODUCT USE QUESTIONNAIRE</b><br>(Complete on same day as urine collection) |                                             |                       |                       | EARTH Study  |                       |                       |                                                                           |
|--------------------------------------------------------------------------------------|------------------------|--------------------------------------------------------------------------------|---------------------------------------------|-----------------------|-----------------------|-------------------------------------------------------------------------------------------------|-----------------------|-----------------------|---------------------------------------------------------------------------|
| 1. Please indicate use of any of these products in the PAST 24 HOURS.                | USED IN PAST 24 HOURS? |                                                                                | TIME LAST USED?<br>(Please circle AM or PM) | YESTERDAY OR TODAY?   |                       | SCENTED?                                                                                        |                       |                       | COMMENTS                                                                  |
|                                                                                      | No                     | Yes                                                                            |                                             | Yesterday             | Today                 | Scented                                                                                         | Not scented           | Don't know            |                                                                           |
| Deodorant                                                                            | <input type="radio"/>  | <input type="radio"/>                                                          | ___:___ AM / PM                             | <input type="radio"/> | <input type="radio"/> | <input type="radio"/>                                                                           | <input type="radio"/> | <input type="radio"/> |                                                                           |
| Shampoo                                                                              | <input type="radio"/>  | <input type="radio"/>                                                          | ___:___ AM / PM                             | <input type="radio"/> | <input type="radio"/> | <input type="radio"/>                                                                           | <input type="radio"/> | <input type="radio"/> |                                                                           |
| Conditioner/Creme Rinse                                                              | <input type="radio"/>  | <input type="radio"/>                                                          | ___:___ AM / PM                             | <input type="radio"/> | <input type="radio"/> | <input type="radio"/>                                                                           | <input type="radio"/> | <input type="radio"/> |                                                                           |
| Hairspray/Hair Gel                                                                   | <input type="radio"/>  | <input type="radio"/>                                                          | ___:___ AM / PM                             | <input type="radio"/> | <input type="radio"/> | <input type="radio"/>                                                                           | <input type="radio"/> | <input type="radio"/> |                                                                           |
| Other hair care products<br>(e.g., mousse, hair bleach, relaxer, Perm, straightener) | <input type="radio"/>  | <input type="radio"/>                                                          | ___:___ AM / PM                             | <input type="radio"/> | <input type="radio"/> | <input type="radio"/>                                                                           | <input type="radio"/> | <input type="radio"/> |                                                                           |
| Toothpaste                                                                           | <input type="radio"/>  | <input type="radio"/>                                                          | ___:___ AM / PM                             | <input type="radio"/> | <input type="radio"/> |                                                                                                 |                       |                       |                                                                           |
| Mouthwash                                                                            | <input type="radio"/>  | <input type="radio"/>                                                          | ___:___ AM / PM                             | <input type="radio"/> | <input type="radio"/> |                                                                                                 |                       |                       |                                                                           |
| Shaving Cream                                                                        | <input type="radio"/>  | <input type="radio"/>                                                          | ___:___ AM / PM                             | <input type="radio"/> | <input type="radio"/> | <input type="radio"/>                                                                           | <input type="radio"/> | <input type="radio"/> |                                                                           |
| Cologne/Perfume                                                                      | <input type="radio"/>  | <input type="radio"/>                                                          | ___:___ AM / PM                             | <input type="radio"/> | <input type="radio"/> | <input type="radio"/>                                                                           | <input type="radio"/> | <input type="radio"/> |                                                                           |
| Aftershave                                                                           | <input type="radio"/>  | <input type="radio"/>                                                          | ___:___ AM / PM                             | <input type="radio"/> | <input type="radio"/> | <input type="radio"/>                                                                           | <input type="radio"/> | <input type="radio"/> |                                                                           |
| Bar Soap                                                                             | <input type="radio"/>  | <input type="radio"/>                                                          | ___:___ AM / PM                             | <input type="radio"/> | <input type="radio"/> | <input type="radio"/>                                                                           | <input type="radio"/> | <input type="radio"/> |                                                                           |
| Liquid Soap/Body Wash                                                                | <input type="radio"/>  | <input type="radio"/>                                                          | ___:___ AM / PM                             | <input type="radio"/> | <input type="radio"/> | <input type="radio"/>                                                                           | <input type="radio"/> | <input type="radio"/> |                                                                           |
| Hand Sanitizer                                                                       | <input type="radio"/>  | <input type="radio"/>                                                          | ___:___ AM / PM                             | <input type="radio"/> | <input type="radio"/> | <input type="radio"/>                                                                           | <input type="radio"/> | <input type="radio"/> |                                                                           |
| Hand/Body lotion                                                                     | <input type="radio"/>  | <input type="radio"/>                                                          | ___:___ AM / PM                             | <input type="radio"/> | <input type="radio"/> | <input type="radio"/>                                                                           | <input type="radio"/> | <input type="radio"/> | Contains sunscreen?<br><input type="radio"/> Yes <input type="radio"/> No |
| Face moisturizer/lotion                                                              | <input type="radio"/>  | <input type="radio"/>                                                          | ___:___ AM / PM                             | <input type="radio"/> | <input type="radio"/> | <input type="radio"/>                                                                           | <input type="radio"/> | <input type="radio"/> | Contains sunscreen?<br><input type="radio"/> Yes <input type="radio"/> No |
| Colored Cosmetics<br>(e.g., hair dye, makeup)                                        | <input type="radio"/>  | <input type="radio"/>                                                          | ___:___ AM / PM                             | <input type="radio"/> | <input type="radio"/> | <input type="radio"/>                                                                           | <input type="radio"/> | <input type="radio"/> | Contains sunscreen?<br><input type="radio"/> Yes <input type="radio"/> No |
| Suntan/Sunblock Lotion                                                               | <input type="radio"/>  | <input type="radio"/>                                                          | ___:___ AM / PM                             | <input type="radio"/> | <input type="radio"/> | <input type="radio"/>                                                                           | <input type="radio"/> | <input type="radio"/> |                                                                           |
| Nail Polish                                                                          | <input type="radio"/>  | <input type="radio"/>                                                          | ___:___ AM / PM                             | <input type="radio"/> | <input type="radio"/> | <input type="radio"/>                                                                           | <input type="radio"/> | <input type="radio"/> |                                                                           |
| Nail Polish Remover                                                                  | <input type="radio"/>  | <input type="radio"/>                                                          | ___:___ AM / PM                             | <input type="radio"/> | <input type="radio"/> | <input type="radio"/>                                                                           | <input type="radio"/> | <input type="radio"/> |                                                                           |
| Other toiletries<br>(e.g., wax, vaseline, lip balm)                                  | <input type="radio"/>  | <input type="radio"/>                                                          | ___:___ AM / PM                             | <input type="radio"/> | <input type="radio"/> | <input type="radio"/>                                                                           | <input type="radio"/> | <input type="radio"/> | Contains sunscreen?<br><input type="radio"/> Yes <input type="radio"/> No |

**Figure S1. Spearman correlation between urinary concentrations of phthalate metabolites and parabens among 965 samples provided by men in the Environment And Reproductive Health (EARTH) Study.**

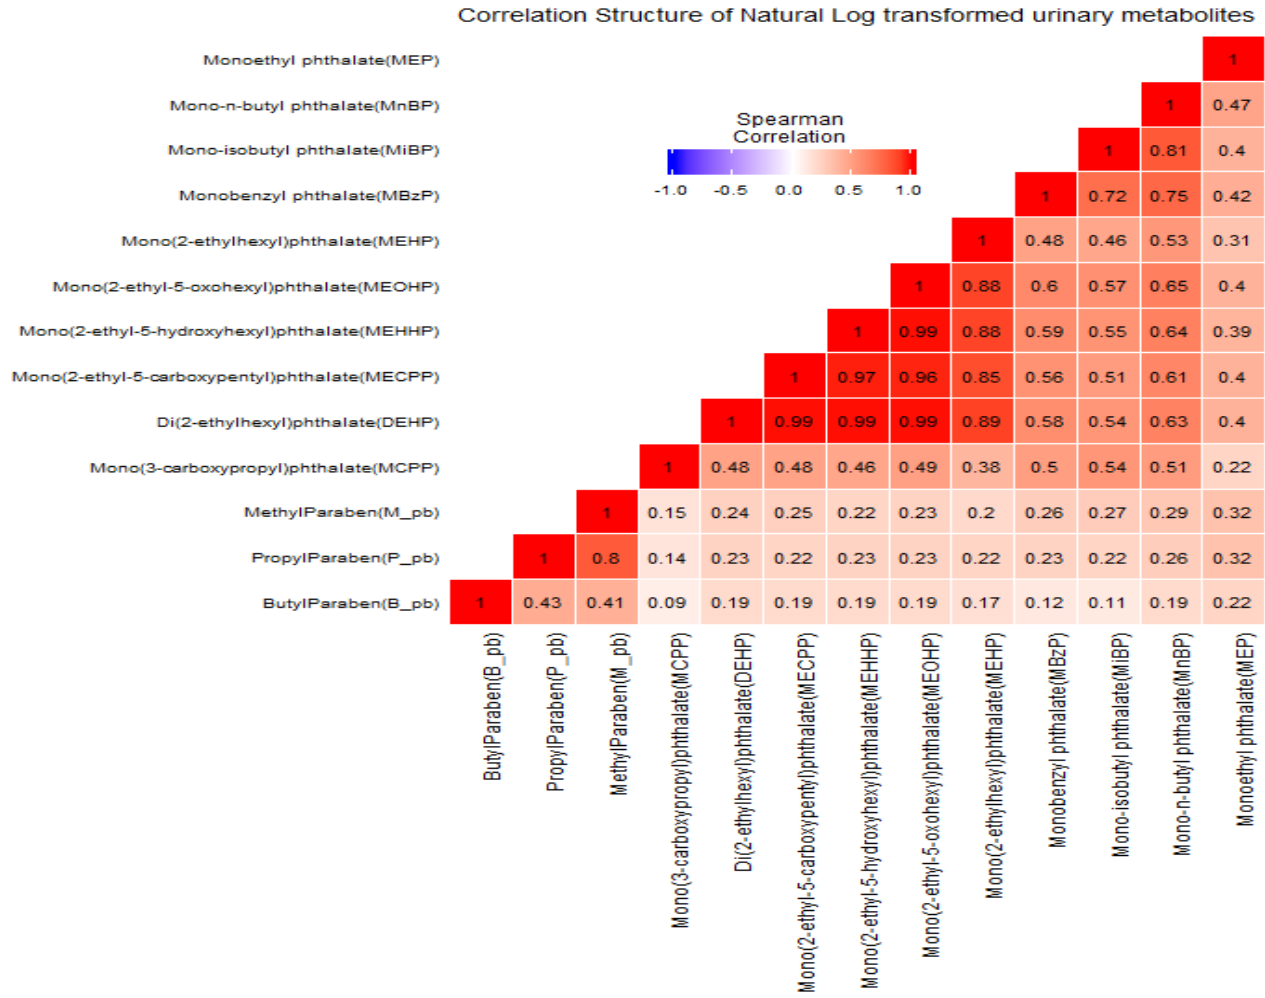

<sup>a</sup> 1037 urine samples were analyzed for phthalate metabolites and 965 for parabens.

<sup>b</sup> For Spearman correlations, data was restricted to 965 urine samples for which both phthalate metabolites and parabens were measured.

**Table S1. Adjusted <sup>a</sup> percent change associated with the weighted score: (based on binary use up-to 24 hours use and 6 hours) using the weighted binary score (WBS) in the 10 imputed data.**

| Urinary biomarker  | Percent change associated with the weighted score for the 14 PCPs: (based on binary use up-to 24 hours use) |          | Percent change associated with the weighted with the weighted score: (based on binary use up-to 6 hours use) |          |
|--------------------|-------------------------------------------------------------------------------------------------------------|----------|--------------------------------------------------------------------------------------------------------------|----------|
|                    | % Change (95% CI)                                                                                           | p-value  | % Change (95% CI)                                                                                            | p-value  |
| MEP                | 700 (258, 1686)                                                                                             | 2.42E-06 | 961 (485, 1823)                                                                                              | 1.80E-14 |
| MnBP               | 39.0 (-29.5, 174)                                                                                           | 0.33     | 13.7 (-18.5, 58.6)                                                                                           | 0.45     |
| MiBP               | 47.0 (-23.1, 181)                                                                                           | 0.24     | 16.1 (-19.6, 67.6)                                                                                           | 0.43     |
| MBzP               | 20.6 (-41.3, 148)                                                                                           | 0.60     | -1.79 (-40.1, 61.1)                                                                                          | 0.94     |
| MEHP               | -2.20 (-58.6, 131)                                                                                          | 0.96     | -21.4 (-56.7, 42.9)                                                                                          | 0.43     |
| MEOHP              | 9.14 (-46.5, 123)                                                                                           | 0.81     | -25.3 (-58.4, 34.2)                                                                                          | 0.32     |
| MEHHP              | 6.20 (-50.1, 126)                                                                                           | 0.87     | -20.6 (-55.5, 41.9)                                                                                          | 0.43     |
| MECPP              | 3.60 (-48.3, 107)                                                                                           | 0.92     | -19.6 (-51.8, 34.1)                                                                                          | 0.40     |
| ∑DEHP <sup>b</sup> | 5.46 (-47.6, 112)                                                                                           | 0.88     | -21.4 (-53.7, 33.5)                                                                                          | 0.37     |
| M CPP              | 3.48 (-59.5, 165)                                                                                           | 0.94     | -33.9 (-60.3, 9.99)                                                                                          | 0.11     |
| Methylparaben      | 1013 (-90.8, 135010)                                                                                        | 0.29     | 1806 (417, 6925)                                                                                             | 0.00008  |
| Propylparaben      | 1398 (-96.1, 575248)                                                                                        | 0.35     | 3626 (535, 21763)                                                                                            | 0.0002   |
| Butylparaben       | 192 (-77.1, 3617)                                                                                           | 0.40     | 458 (58.3, 1868)                                                                                             | 0.009    |

Abbreviations: PCP; personal care product, 95% CI; 95% confidence intervals, MEP; Monoethyl phthalate, MnBP; Mono-n-butyl phthalate, MiBP; Mono-isobutyl phthalate, MBzP; Monobenzyl phthalate, MEHP; Mono(2-ethylhexyl) phthalate, MEOHP; Mono(2-ethyl-5-oxohexyl) phthalate, MEHHP; Mono(2-ethyl-5-hydroxyhexyl) phthalate, MECPP; Mono(2-ethyl-5-carboxypentyl) phthalate, DEHP; (Di(2-ethylhexyl) phthalate) metabolites, M CPP; Mono(3-carboxypropyl) phthalate.

<sup>a</sup> Analysis adjusted for urine specific gravity (continuous), race (Caucasian or not), age (continuous), BMI (continuous), calendar year (continuous), time of sample collection (early morning (5am< and <=9am), late morning (9am< and <=12pm) or afternoon(>12pm)), current smoking (yes/no), warm season (April through September) (yes/no) and the product use within 24 hours (yes/no).

<sup>b</sup> ∑DEHP metabolites= MEHP+ MEOHP+ MEHHP+ MECPP weighted by the molecular weight.

**Table S2. Adjusted <sup>a</sup> odds ratio for detected versus undetected urinary butylparaben associated with last 24 hours personal care product use in the 10 imputed data.**

| <b>Personal care product</b>                                                         | <b>Odds ratio (OR) (95% CI)</b> | <b>p-value</b> |
|--------------------------------------------------------------------------------------|---------------------------------|----------------|
| Total_product                                                                        | 1.14 (1.06, 1.23)               | 0.0004         |
| Deodorant                                                                            | 1.08 (0.72, 1.63)               | 0.70           |
| Shampoo                                                                              | 1.21 (0.86, 1.70)               | 0.26           |
| Conditioner/Creme Rinse                                                              | 1.24 (0.84, 1.83)               | 0.28           |
| Hairspray/Hair Gel                                                                   | 1.34 (0.92, 1.96)               | 0.13           |
| Other hair care products<br>(e.g., mousse, hair bleach, relaxer, Perm, straightener) | 1.62 (0.93, 2.84)               | 0.09           |
| Shaving Cream                                                                        | 1.18 (0.90, 1.56)               | 0.23           |
| Aftershave                                                                           | 1.08 (0.69, 1.68)               | 0.75           |
| Cologne/Perfume                                                                      | 1.16 (0.81, 1.68)               | 0.41           |
| Mouthwash                                                                            | 1.38 (1.00, 1.90)               | 0.049          |
| Bar Soap                                                                             | 0.92 (0.65, 1.32)               | 0.66           |
| Liquid Soap/Body Wash                                                                | 1.39 (1.01, 1.93)               | 0.046          |
| Hand Sanitizer                                                                       | 0.92 (0.63, 1.33)               | 0.65           |
| Hand/Body lotion                                                                     | 1.39 (0.98, 1.96)               | 0.06           |
| Suntan/Sunblock Lotion                                                               | 2.27 (1.00, 5.18)               | 0.05           |

Abbreviations: OR; odds ratio, 95% CI; 95% confidence intervals, MEP; Monoethyl phthalate, MnBP; Mono-n-butyl phthalate, MiBP; Mono-isobutyl phthalate, MBzP; Monobenzyl phthalate, MEHP; Mono(2-ethylhexyl) phthalate, MEOHP; Mono(2-ethyl-5-oxohexyl) phthalate, MEHHP; Mono(2-ethyl-5-hydroxyhexyl) phthalate, MECPP; Mono(2-ethyl-5-carboxypentyl) phthalate, DEHP; (Di(2-ethylhexyl) phthalate) metabolites, MCPP; Mono(3-carboxypropyl) phthalate.

<sup>a</sup> Analysis adjusted for urine specific gravity (continuous), race (Caucasian or not), age (continuous), BMI (continuous), calendar year (continuous), time of sample collection (early morning (5am< and <=9am), late morning (9am< and <=12pm) or afternoon(>12pm)), current smoking (yes/no), warm season (April through September) (yes/no) and the product use within 24 hours (yes/no).

<sup>b</sup> Generalized estimating equations (GEE) was used for modeling butylparaben as binary variable: detected vs undetected in the 10 imputed data.

**Figure S2. Heatmap for adjusted % change in urinary concentrations of phthalate metabolites and parabens associated with self-report use of personal care products (PCPs) within 24 hours of urine sample collection among 400 men who contributed 1037 urine samples in the Environment And Reproductive Health (EARTH) Study in the complete case data.**

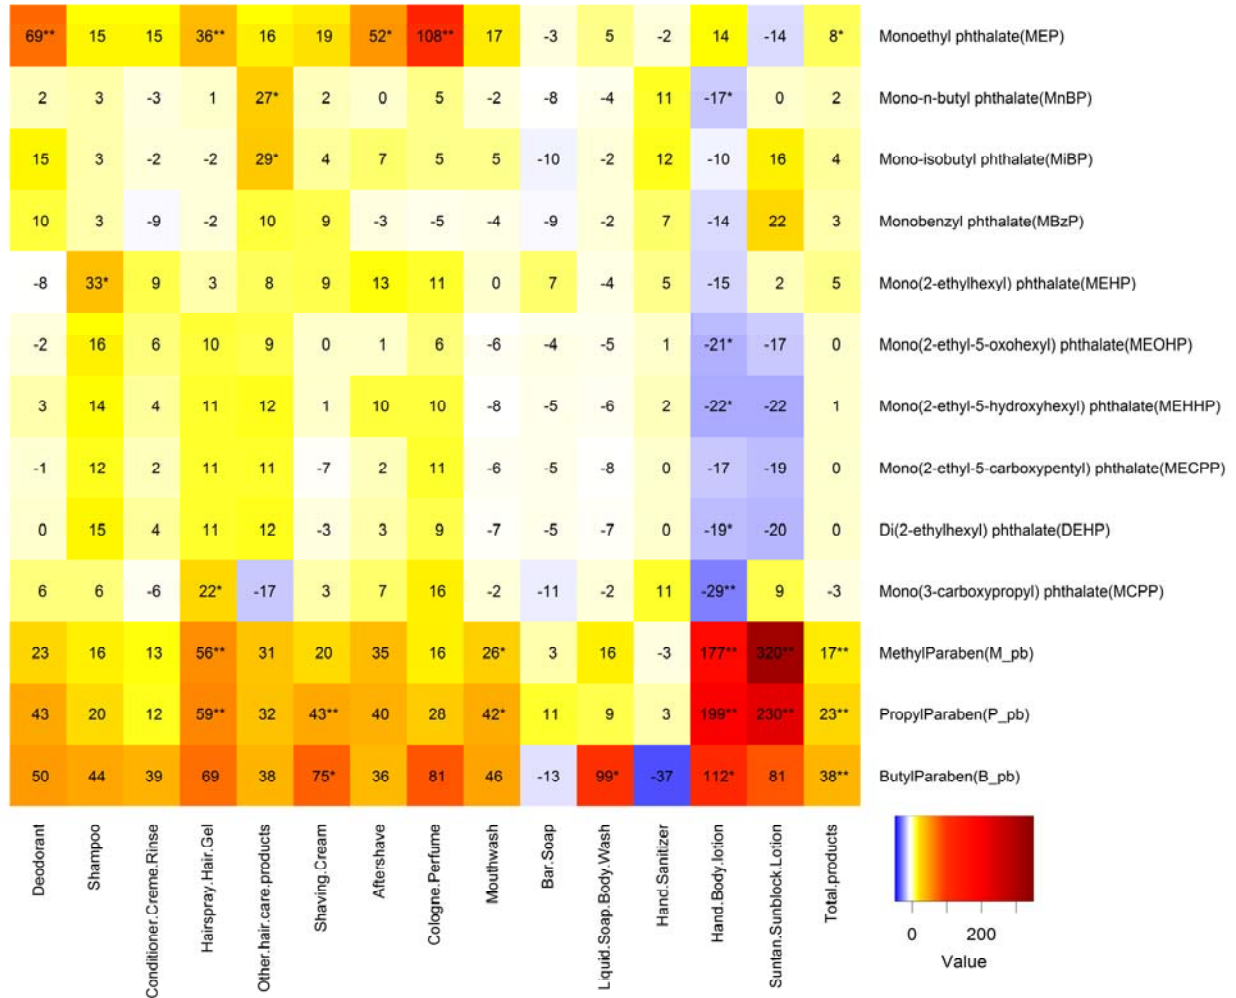

<sup>a</sup> Significance indicated as \*: if p-value < 0.05, \*\*: if p-value < 0.01

<sup>b</sup> DEHP means:  $\sum$ DEHP metabolites= MEHP+ MEOHP+ MEHHP+ MECPP weighted by the molecular weight

<sup>c</sup> Analysis was based on complete case analyses.

<sup>d</sup> Analysis adjusted for urine specific gravity (continuous), race (Caucasian or not), age (continuous), BMI (continuous), calendar year (continuous), time of sample collection (early morning (5am< and <=9am), late morning (9am< and <=12pm) or afternoon(>12pm)), current smoking (yes/no), warm season (April through September) (yes/no) and the product use within 24 hours (yes/no).

<sup>e</sup> Total products: the crude sum of PCP used within 24 hours.

<sup>f</sup> The last column for the total products represents percent changes associated with each additional type of PCP used, regardless of which PCP.

<sup>g</sup> Urinary biomarkers were ordered according to the molecular weights within phthalates and within parabens.

<sup>h</sup> Combined other hair care products included mousse, hair bleach, relaxer, perm and straightener.

**Table S3. Adjusted <sup>a</sup> odds ratio for detected versus undetected urinary butylparaben associated with last 24 hours personal care product use in the complete case data.**

| <b>Personal care product</b>                                                         | <b>OR (95% CI)</b> | <b>p-value</b> |
|--------------------------------------------------------------------------------------|--------------------|----------------|
| Total_product                                                                        | 1.16 (1.04, 1.29)  | 0.0055         |
| Deodorant                                                                            | 1.10 (0.72, 1.66)  | 0.6691         |
| Shampoo                                                                              | 1.23 (0.87, 1.72)  | 0.2444         |
| Conditioner/Creme Rinse                                                              | 1.18 (0.80, 1.74)  | 0.4109         |
| Hairspray/Hair Gel                                                                   | 1.36 (0.93, 1.97)  | 0.1087         |
| Other hair care products<br>(e.g., mousse, hair bleach, relaxer, Perm, straightener) | 1.81 (0.98, 3.35)  | 0.0572         |
| Shaving Cream                                                                        | 1.20 (0.91, 1.60)  | 0.1967         |
| Aftershave                                                                           | 0.99 (0.61, 1.61)  | 0.978          |
| Cologne/Perfume                                                                      | 1.29 (0.87, 1.90)  | 0.201          |
| Mouthwash                                                                            | 1.43 (1.03, 1.98)  | 0.0331         |
| Bar Soap                                                                             | 0.94 (0.65, 1.36)  | 0.7558         |
| Liquid Soap/Body Wash                                                                | 1.41 (1.01, 1.96)  | 0.0407         |
| Hand Sanitizer                                                                       | 0.93 (0.66, 1.31)  | 0.6812         |
| Hand/Body lotion                                                                     | 1.36 (0.91, 2.05)  | 0.1355         |
| Suntan/Sunblock Lotion                                                               | 3.44 (1.60, 7.40)  | 0.0016         |

Abbreviations: OR; odds ratio, 95% CI; 95% confidence intervals, MEP; Monoethyl phthalate, MnBP; Mono-n-butyl phthalate, MiBP; Mono-isobutyl phthalate, MBzP; Monobenzyl phthalate, MEHP; Mono(2-ethylhexyl) phthalate, MEOHP; Mono(2-ethyl-5-oxohexyl) phthalate, MEHHP; Mono(2-ethyl-5-hydroxyhexyl) phthalate, MECPP; Mono(2-ethyl-5-carboxypentyl) phthalate, DEHP; (Di(2-ethylhexyl) phthalate) metabolites, MCPP; Mono(3-carboxypropyl) phthalate.

<sup>a</sup> Analysis adjusted for urine specific gravity (continuous), race (Caucasian or not), age (continuous), BMI (continuous), calendar year (continuous), time of sample collection (early morning (5am< and <=9am), late morning (9am< and <=12pm) or afternoon(>12pm)), current smoking (yes/no), warm season (April through September) (yes/no) and the product use within 24 hours (yes/no).

<sup>b</sup> Generalized estimating equations (GEE) was used for modeling butylparaben as binary variable: detected vs undetected in the complete case data.



Figure S3. (Panels A to E): Adjusted % change in urinary concentrations of parabens and phthalate metabolites associated with use of 14 personal care products (PCPs) within 24 and 6 hours of urine collection in the complete case analysis.

Panel 3A. Monoethyl phthalate (MEP) urinary concentration

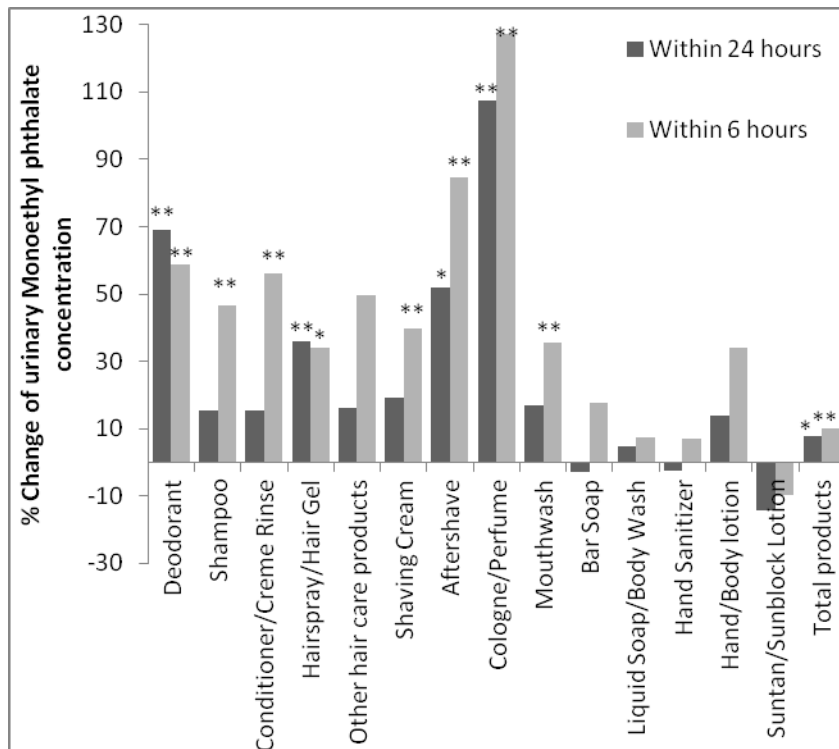

Panel 3B. Mono-isobutyl phthalate (MiBP) urinary concentration

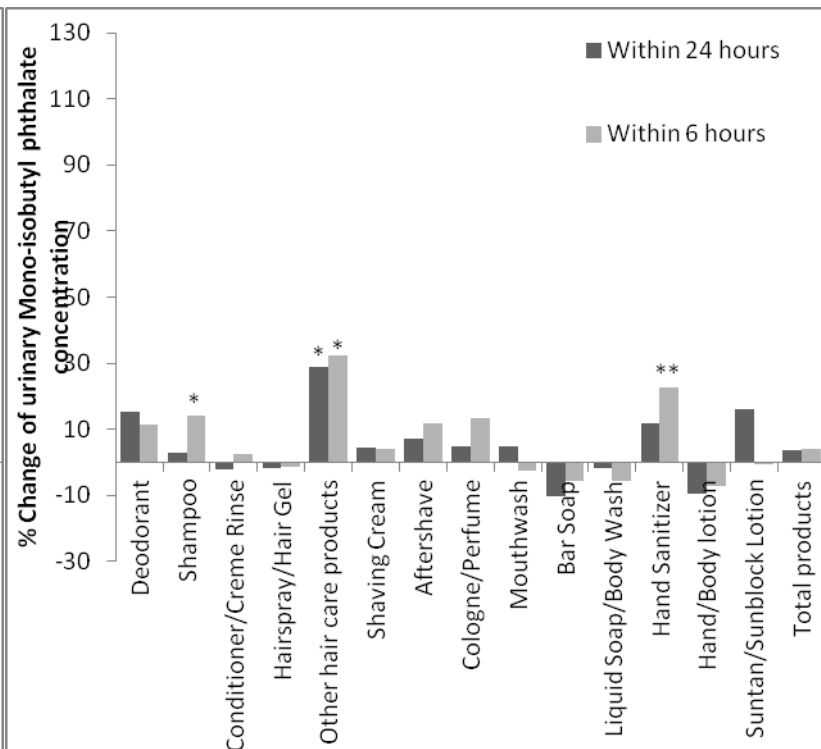

**Panel 3C. Butylparaben urinary concentration**

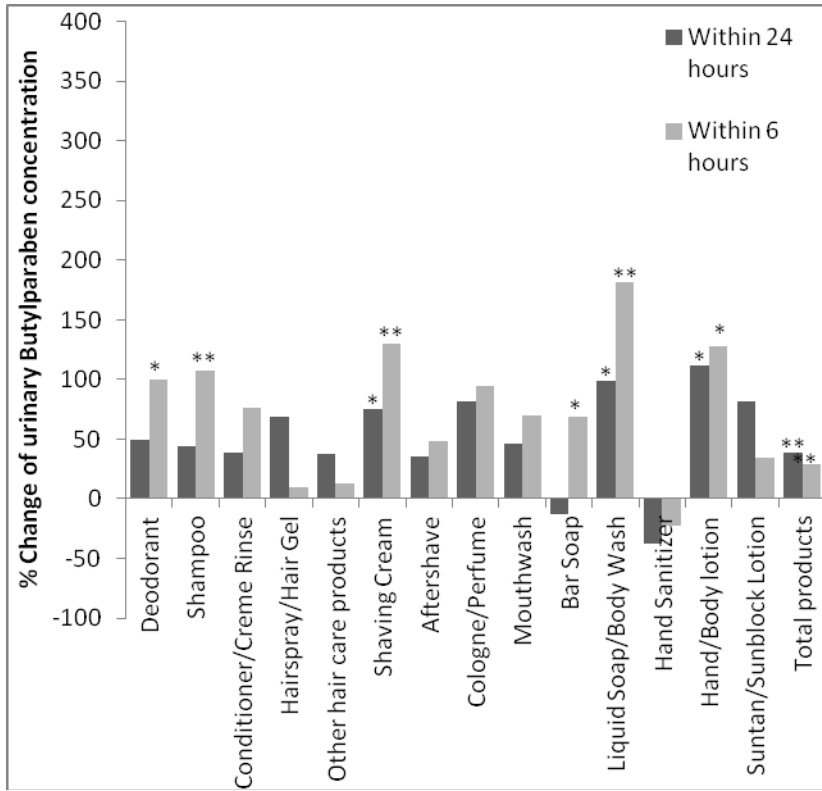

**Panel 3D. Methylparaben urinary concentration**

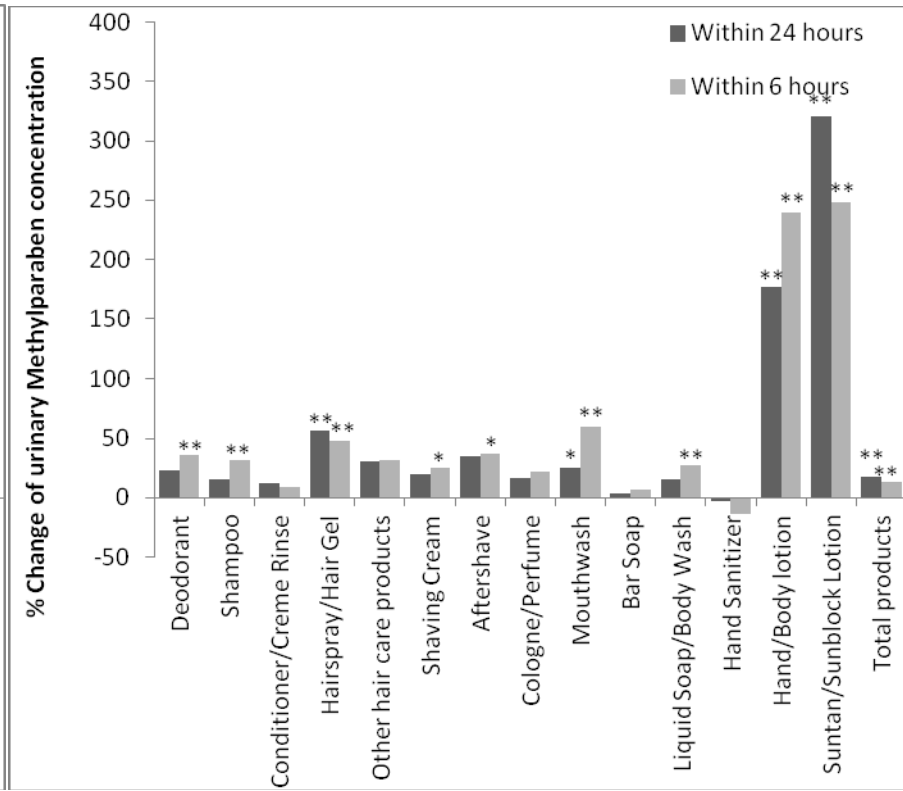

**Panel 3E. Propylparaben urinary concentration**

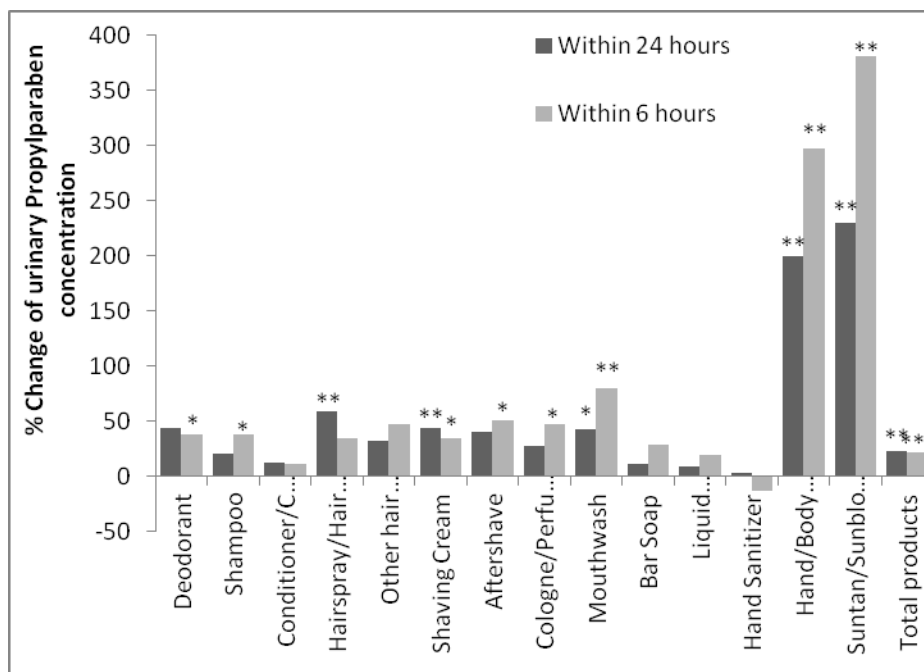

<sup>a</sup> Statistical significance indicated as \*: if p-value < 0.05, \*\*: if p-value < 0.01

<sup>b</sup> Analysis adjusted for urine specific gravity (continuous), race (Caucasian or not), age (continuous), BMI (continuous), calendar year (continuous), time of sample collection (early morning (5am< and <=9am), late morning (9am< and <=12pm) or afternoon(>12pm)), current smoking (yes/no), warm season (April through September) (yes/no) and the product use within 24 hours (yes/no).

<sup>c</sup> Total products: the crude sum of PCP used within 24 hours

<sup>d</sup> The total products' bars represent percent changes associated with each additional type of PCP used, regardless of which PCP.

<sup>e</sup> Combined other hair care products included mousse, hair bleach, relaxer, perm and straightener

**Table S4. Adjusted <sup>a</sup> percent change associated with the weighted score: (based on binary use up-to 24 hours use and 6 hours) using the weighted binary score (WBS) in the complete case data.**

| Urinary biomarker  | Percent change associated with the weighted score: (based on binary use up-to 24 hours use) |         | Percent change associated with the weighted score: (based on binary use up-to 6 hours use) |         |
|--------------------|---------------------------------------------------------------------------------------------|---------|--------------------------------------------------------------------------------------------|---------|
|                    | % Change (95% CI)                                                                           | p-value | % Change(95% CI)                                                                           | p-value |
| MEP                | 281 (23, 1081)                                                                              | 0.02    | 429 (31, 2027)                                                                             | 0.02    |
| MnBP               | 1 (-51, 107)                                                                                | 0.98    | 107 (4, 313)                                                                               | 0.04    |
| MiBP               | -16 (-59, 70)                                                                               | 0.62    | 62 (-31, 281)                                                                              | 0.26    |
| MBzP               | 52 (-13, 164)                                                                               | 0.14    | 22 (-40, 147)                                                                              | 0.58    |
| MEHP               | -28 (-63, 39)                                                                               | 0.33    | -41 (-74, 30)                                                                              | 0.19    |
| MEOHP              | -17 (-60, 74)                                                                               | 0.62    | -34 (-70, 43)                                                                              | 0.29    |
| MEHHP              | -7 (-56, 96)                                                                                | 0.84    | -28 (-67, 58)                                                                              | 0.41    |
| MECPP              | -26 (-64, 56)                                                                               | 0.43    | -45 (-73, 12)                                                                              | 0.10    |
| ∑DEHP <sup>b</sup> | -15 (-57, 72)                                                                               | 0.66    | -38 (-70, 26)                                                                              | 0.19    |
| MCPP               | -45 (-79, 46)                                                                               | 0.23    | -69 (-88, -15)                                                                             | 0.02    |
| Methylparaben      | 7597 (2087, 26997)                                                                          | <.0001  | 9957 (2812, 34641)                                                                         | <.0001  |
| Propylparaben      | 4949 (721, 30966)                                                                           | <.0001  | 23225 (3536, 149522)                                                                       | <.0001  |
| Butylparaben       | 577 (133, 1864)                                                                             | 0.0004  | 198 (-14, 928)                                                                             | 0.08    |

Abbreviations: 95% CI; 95% confidence intervals, MEP; Monoethyl phthalate, MnBP; Mono-n-butyl phthalate, MiBP; Mono-isobutyl phthalate, MBzP; Monobenzyl phthalate, MEHP; Mono(2-ethylhexyl) phthalate, MEOHP; Mono(2-ethyl-5-oxohexyl) phthalate, MEHHP; Mono(2-ethyl-5-hydroxyhexyl) phthalate, MECPP; Mono(2-ethyl-5-carboxypentyl) phthalate, DEHP; (Di(2-ethylhexyl) phthalate) metabolites, MCPP; Mono(3-carboxypropyl) phthalate.

<sup>a</sup> Analysis adjusted for urine specific gravity (continuous), race (Caucasian or not), age (continuous), BMI (continuous), calendar year (continuous), time of sample collection (early morning (5am< and <=9am), late morning (9am< and <=12pm) or afternoon(>12pm)), current smoking (yes/no), warm season (April through September) (yes/no) and the product use within 24 hours (yes/no).

<sup>b</sup> ∑DEHP metabolites= MEHP+ MEOHP+ MEHHP+ MECPP weighted by the molecular weight.

**Figure S4. Heatmap for adjusted % change in urinary concentrations of phthalate metabolites and parabens associated with self-report use of personal care products (PCPs) within 24 hours of urine sample collection among 400 men who contributed 1037 urine samples in the Environment And Reproductive Health (EARTH) Study in the imputed missing as zero.**

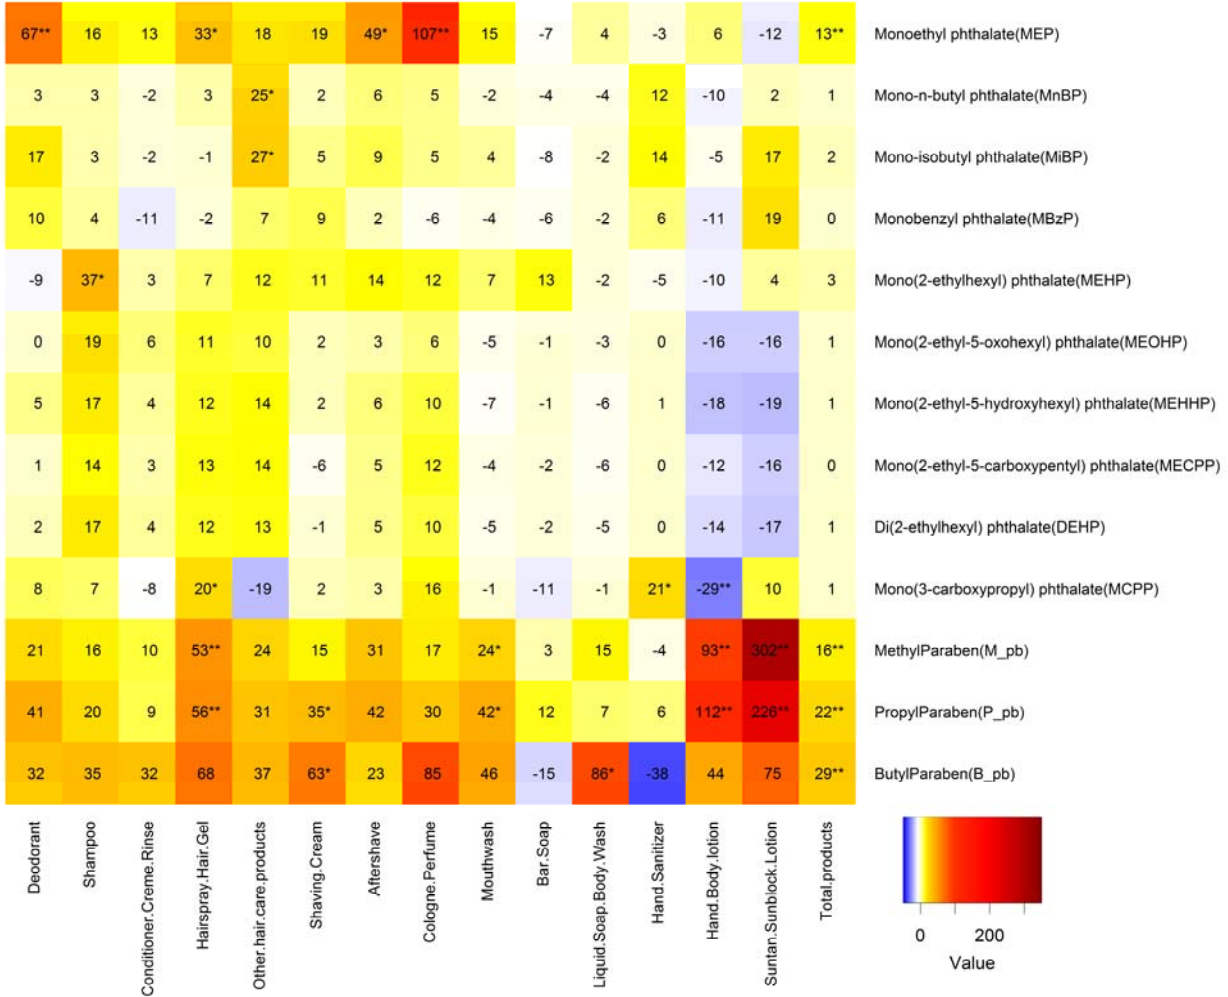

<sup>a</sup> Significance indicated as \*: if p-value < 0.05, \*\*: if p-value < 0.01

<sup>b</sup> Imputation for the missing values of PCP-use was assumed to be “0” i.e. no use.

<sup>c</sup> DEHP means:  $\sum$ DEHP metabolites= MEHP+ MEOHP+ MEHHP+ MECPP weighted by the molecular weight

<sup>d</sup> Analysis adjusted for urine specific gravity (continuous), race (Caucasian or not), age (continuous), BMI (continuous), calendar year (continuous), time of sample collection (early morning (5am< and <=9am), late morning (9am< and <=12pm) or afternoon(>12pm)), current smoking (yes/no), warm season (April through September) (yes/no) and the product use within 24 hours (yes/no).

<sup>e</sup> Total products: the crude sum of PCP used within 24 hours

<sup>f</sup> The last column for the total products represents percent changes associated with each additional type of PCP used, regardless of which PCP.

<sup>g</sup> Combined other hair care products included mousse, hair bleach, relaxer, perm and straightener

**Table S5. Adjusted <sup>a</sup> odds ratio for detected versus undetected urinary butylparaben associated with last 24 hours personal care product use in the imputed missing as zero.**

| <b>Personal care product</b>                                                         | <b>OR (95% CI)</b> | <b>P-value</b> |
|--------------------------------------------------------------------------------------|--------------------|----------------|
| Total_product                                                                        | 1.14 (1.05, 1.23)  | 0.001          |
| Deodorant                                                                            | 1.05 (0.70, 1.57)  | 0.83           |
| Shampoo                                                                              | 1.23 (0.87, 1.73)  | 0.24           |
| Conditioner/Creme Rinse                                                              | 1.13 (0.78, 1.64)  | 0.52           |
| Hairspray/Hair Gel                                                                   | 1.35 (0.94, 1.93)  | 0.10           |
| Other hair care products<br>(e.g., mousse, hair bleach, relaxer, Perm, straightener) | 1.63 (0.91, 2.90)  | 0.10           |
| Shaving Cream                                                                        | 1.19 (0.90, 1.57)  | 0.22           |
| Aftershave                                                                           | 0.95 (0.61, 1.49)  | 0.82           |
| Cologne/Perfume                                                                      | 1.28 (0.87, 1.88)  | 0.21           |
| Mouthwash                                                                            | 1.40 (1.02, 1.93)  | 0.04           |
| Bar Soap                                                                             | 0.93 (0.65, 1.33)  | 0.68           |
| Liquid Soap/Body Wash                                                                | 1.33 (0.97, 1.84)  | 0.08           |
| Hand Sanitizer                                                                       | 0.88 (0.62, 1.24)  | 0.45           |
| Hand/Body lotion                                                                     | 1.11 (0.78, 1.57)  | 0.56           |
| Suntan/Sunblock Lotion                                                               | 3.25 (1.53, 6.93)  | 0.002          |

Abbreviations: OR; odds ratio, 95% CI; 95% confidence intervals, MEP; Monoethyl phthalate, MnBP; Mono-n-butyl phthalate, MiBP; Mono-isobutyl phthalate, MBzP; Monobenzyl phthalate, MEHP; Mono(2-ethylhexyl) phthalate, MEOHP; Mono(2-ethyl-5-oxohexyl) phthalate, MEHHP; Mono(2-ethyl-5-hydroxyhexyl) phthalate, MECPP; Mono(2-ethyl-5-carboxypentyl) phthalate, DEHP; (Di(2-ethylhexyl) phthalate) metabolites, MCPP; Mono(3-carboxypropyl) phthalate.

<sup>a</sup> Analysis adjusted for urine specific gravity (continuous), race (Caucasian or not), age (continuous), BMI (continuous), calendar year (continuous), time of sample collection (early morning (5am< and <=9am), late morning (9am< and <=12pm) or afternoon(>12pm)), current smoking (yes/no), warm season (April through September) (yes/no) and the product use within 24 hours (yes/no).

<sup>b</sup> Generalized estimating equations (GEE) was used for modeling butylparaben as binary variable: detected vs undetected in the imputed missing as zero.0.

**Figure S5. (Panels A to E): Adjusted % change in urinary concentrations of parabens and phthalate metabolites associated with use of 14 personal care products (PCPs) within 24 and 6 hours of urine collection in the imputed missing as zero.**

**Panel 5A. Monoethyl phthalate (MEP) urinary concentration**

**Panel 5B. Mono-isobutyl phthalate (MiBP) urinary concentration**

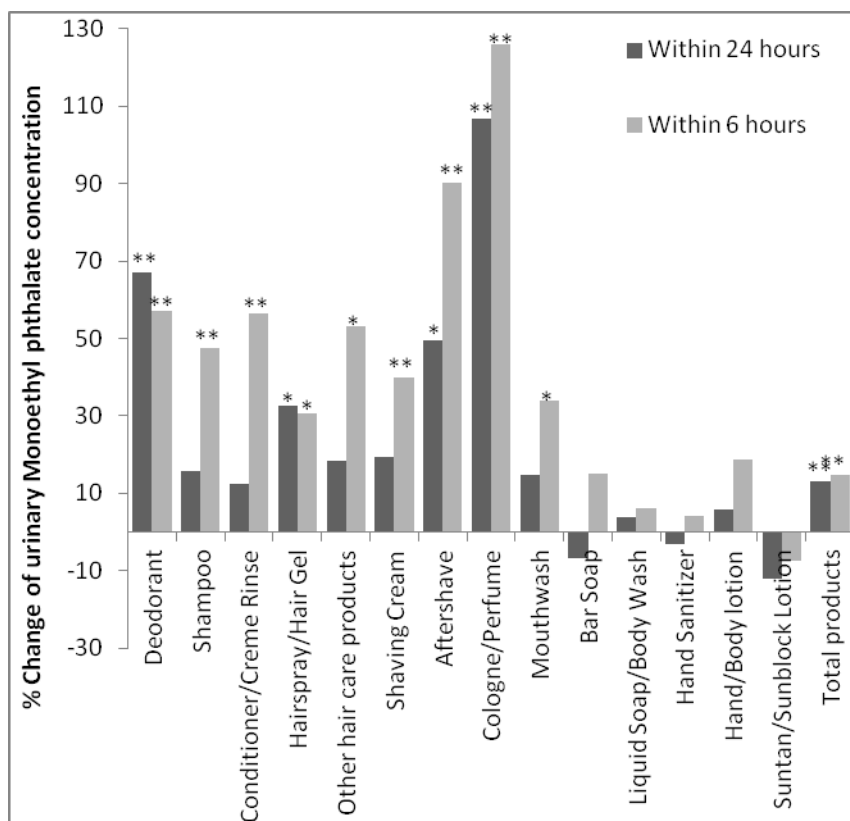



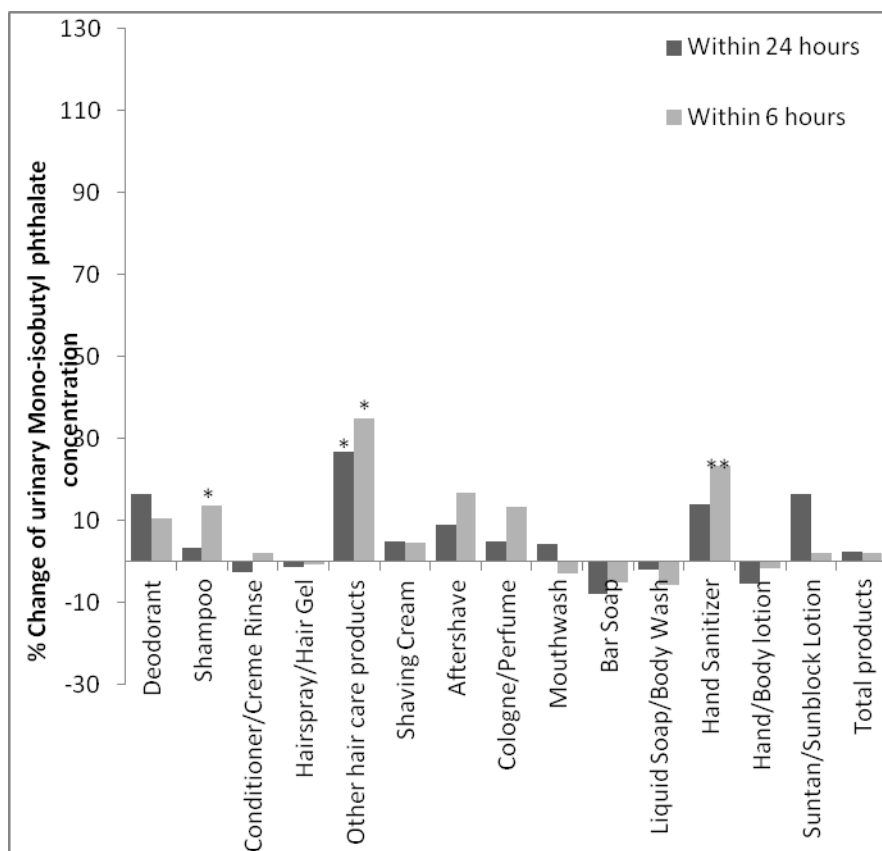

Panel 5C. Butylparaben urinary concentration

Panel 5D. Methylparaben urinary concentration

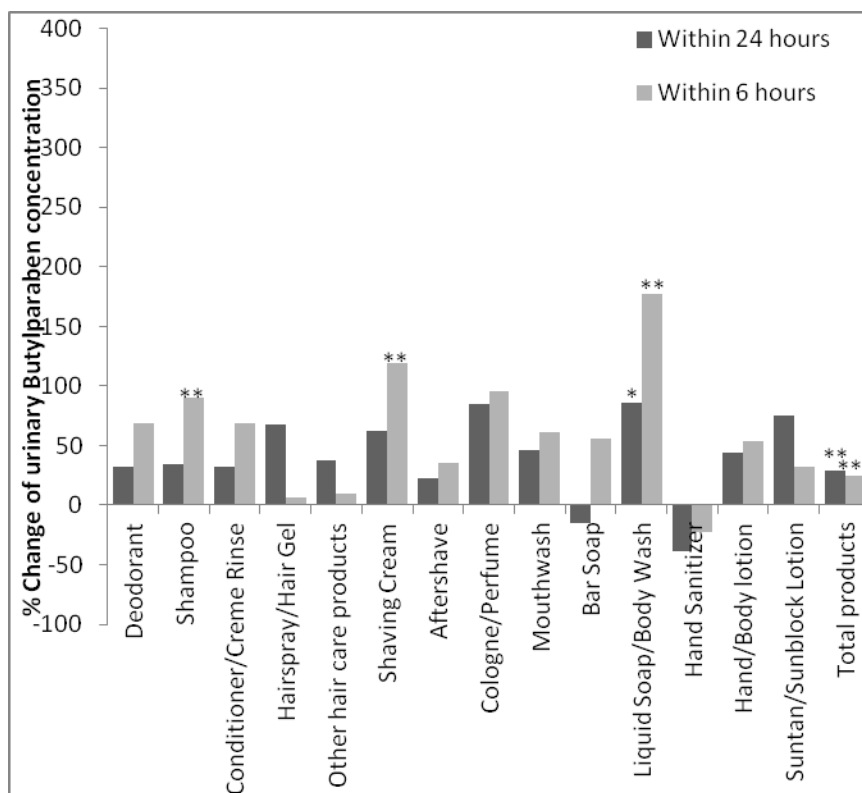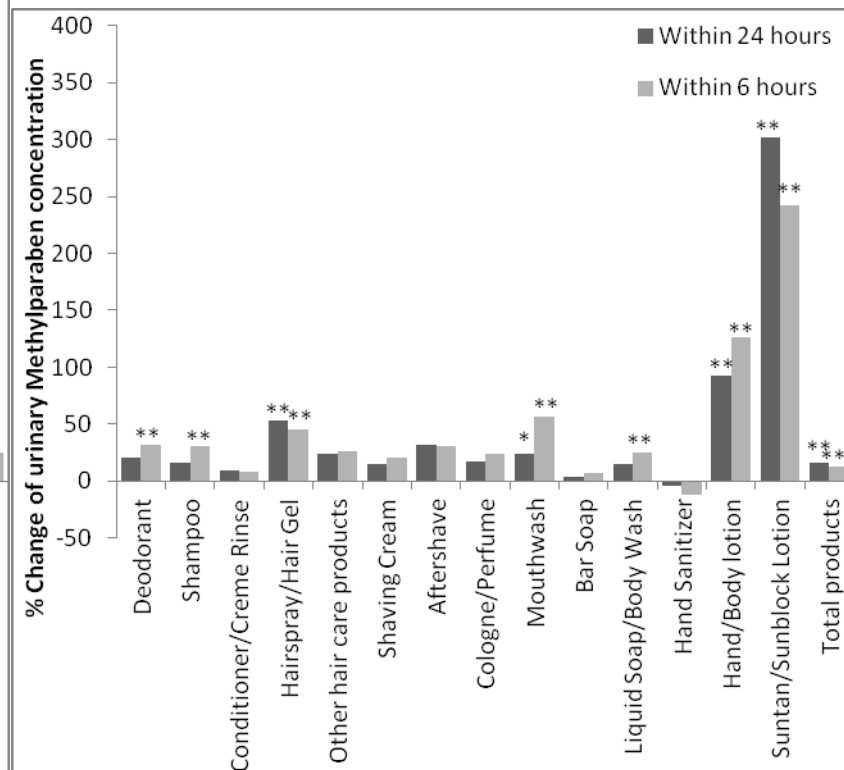

**Panel 5E. Propylparaben urinary concentration**

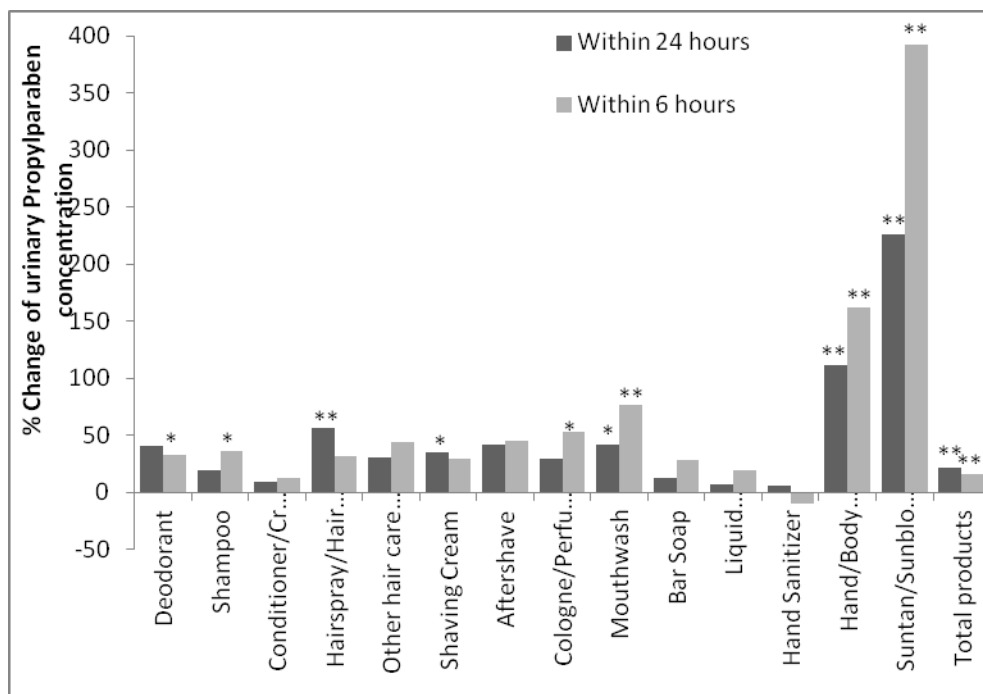

<sup>a</sup> Statistical significance indicated as \*: if p-value < 0.05, \*\*: if p-value < 0.01

<sup>b</sup> Imputation for the missing values of PCP-use was assumed to be “0” i.e. no use.

<sup>c</sup> Analysis adjusted for urine specific gravity (continuous), race (Caucasian or not), age (continuous), BMI (continuous), calendar year (continuous), time of sample collection (early morning (5am< and <=9am), late morning (9am< and <=12pm) or afternoon(>12pm)), current smoking (yes/no), warm season (April through September) (yes/no) and the product use within 24 hours (yes/no).

<sup>d</sup> Total products: the crude sum of PCP used within 24 hours

<sup>e</sup> The total products’ bars represent percent changes associated with each additional type of PCP used, regardless of which PCP.

<sup>f</sup> Combined other hair care products included mousse, hair bleach, relaxer, perm and straightener

**Table S6. Adjusted <sup>a</sup> percent change associated with the weighted score: (based on binary use up-to 24 hours use and 6 hours) using the weighted binary score (WBS) in the imputed missing as zero.**

| Urinary biomarker  | Percent change associated with the weighted score: (based on binary use up-to 24 hours use) |         | Percent change associated with the weighted score: (based on binary use up-to 6 hours use) |         |
|--------------------|---------------------------------------------------------------------------------------------|---------|--------------------------------------------------------------------------------------------|---------|
|                    | % Change (95% CI)                                                                           | p-value | % Change (95% CI)                                                                          | p-value |
| MEP                | 980 (496,1858)                                                                              | <.0001  | 1483 (729,2924)                                                                            | <.0001  |
| MnBP               | 68 (11,155)                                                                                 | 0.02    | 115 (34,246)                                                                               | 0.002   |
| MiBP               | 89 (12,220)                                                                                 | 0.02    | 102 (18,246)                                                                               | 0.01    |
| MBzP               | 6 (-36,76)                                                                                  | 0.81    | 10 (-37,94)                                                                                | 0.74    |
| MEHP               | 3 (-38,71)                                                                                  | 0.91    | -4 (-47,75)                                                                                | 0.91    |
| MEOHP              | 3 (-35,61)                                                                                  | 0.91    | 13 (-28,76)                                                                                | 0.60    |
| MEHHP              | -1 (-38,60)                                                                                 | 0.98    | 19 (-27,94)                                                                                | 0.49    |
| MECPP              | 0 (-33,50)                                                                                  | 0.99    | 12 (-21,59)                                                                                | 0.51    |
| ∑DEHP <sup>b</sup> | 1 (-34,53)                                                                                  | 0.98    | 12 (-24,65)                                                                                | 0.57    |
| MCPP               | 47 (-19,167)                                                                                | 0.21    | -9 (-51,72)                                                                                | 0.78    |
| Methylparaben      | 6202 (2785,13668)                                                                           | <.0001  | 9350 (3876,22362)                                                                          | <.0001  |
| Propylparaben      | 6512 (2099,19778)                                                                           | <.0001  | 17283 (4909,60235)                                                                         | <.0001  |
| Butylparaben       | 199 (54,479)                                                                                | 0.001   | 487 (199,1055)                                                                             | <.0001  |

Abbreviations: 95% CI; 95% confidence intervals, MEP; Monoethyl phthalate, MnBP; Mono-n-butyl phthalate, MiBP; Mono-isobutyl phthalate, MBzP; Monobenzyl phthalate, MEHP; Mono(2-ethylhexyl) phthalate, MEOHP; Mono(2-ethyl-5-oxohexyl) phthalate, MEHHP; Mono(2-ethyl-5-hydroxyhexyl) phthalate, MECPP; Mono(2-ethyl-5-carboxypentyl) phthalate, DEHP; (Di(2-ethylhexyl) phthalate) metabolites, MCPP; Mono(3-carboxypropyl) phthalate.

<sup>a</sup> Analysis adjusted for urine specific gravity (continuous), race (Caucasian or not), age (continuous), BMI (continuous), calendar year (continuous), time of sample collection (early morning (5am< and <=9am), late morning (9am< and <=12pm) or afternoon(>12pm)), current smoking (yes/no), warm season (April through September) (yes/no) and the product use within 24 hours (yes/no).

<sup>b</sup> ∑DEHP metabolites= MEHP+ MEOHP+ MEHHP+ MECPP weighted by the molecular weight.
